# Supplementary material
Source: publisher figshare collection journal article supplement (https://tandf.figshare.com/ndownloader/files/22852055)
Supplement: Supplementary file 1 [file 22852055]

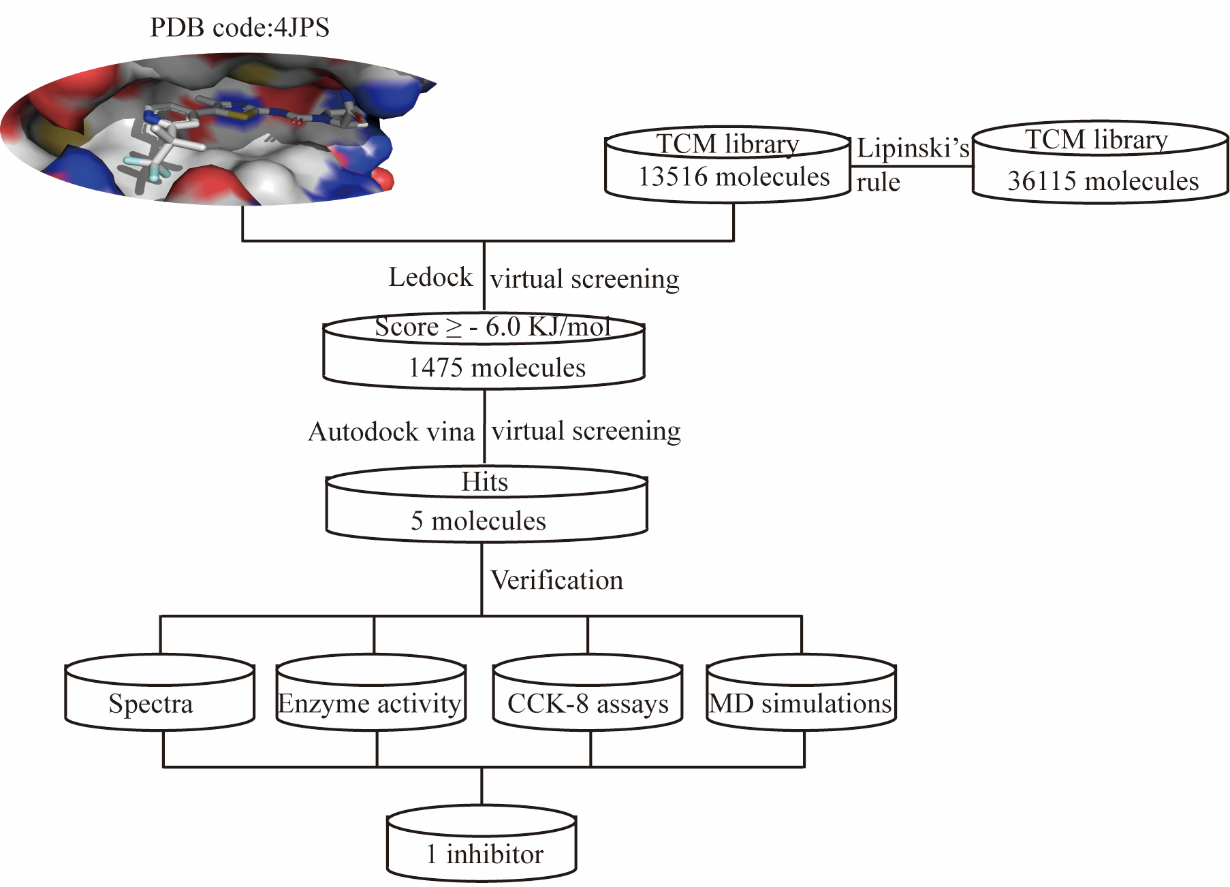


Figure S1**.** The flowchart of the identification of novel potential PI3Kα inhibitors.


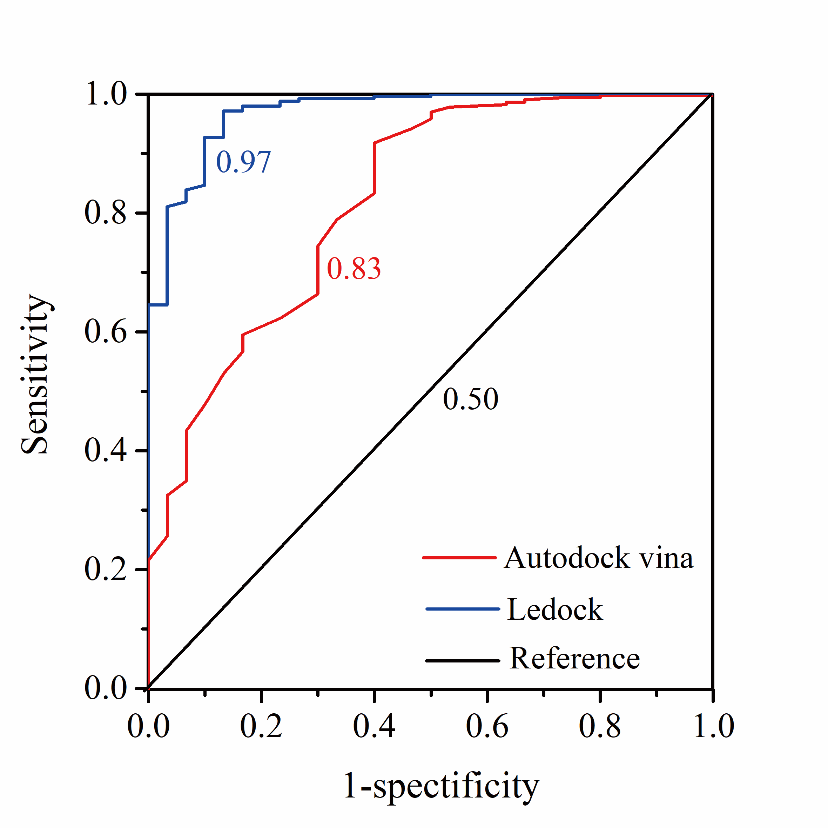


Figure S2. Receiver operating characteristic (ROC) curves of the docking model.
